# Supplementary material for: Characterization of primary and aged wood burning and coal combustion organic aerosols in environmental chamber and its implications for atmospheric aerosols
Source: Copernicus journal article supplement (doi:10.5194/acp-2020-924), 2020-09-28
Supplement: Supplementary file 1 [file acp-2020-924-supplement.pdf]

# Characterization of primary and aged wood burning and coal combustion organic aerosols in environmental chamber and its implications for atmospheric aerosols

Amir Yazdani<sup>1</sup>, Nikunj Dudani<sup>1</sup>, Satoshi Takahama<sup>1</sup>, Amelie Bertrand<sup>2</sup>, André S. H. Prévôt<sup>2</sup>, Imad El Haddad<sup>2</sup>, and Ann M. Dillner<sup>3</sup>

<sup>1</sup>ENAC/IE Swiss Federal Institute of Technology Lausanne (EPFL), 1015 Lausanne, Switzerland

<sup>2</sup>Laboratory of Atmospheric Chemistry, Paul Scherrer Institute, 5232 Villigen, Switzerland

<sup>3</sup>Air Quality Research Center, University of California Davis, Davis, California, USA

**Correspondence:** Satoshi Takahama (satoshi.takahama@epfl.ch) and Imad El Haddad (imad.el-haddad@psi.ch)

---

## Contents

|                                                                                       |            |
|---------------------------------------------------------------------------------------|------------|
| <b>S1 Experimental set-up</b>                                                         | <b>S1</b>  |
| <b>S2 Blank subtraction</b>                                                           | <b>S1</b>  |
| <b>S3 Dimensionality reduction</b>                                                    | <b>S2</b>  |
| <b>S4 The MIR and AMS spectra and chemical composition of the chamber experiments</b> | <b>S2</b>  |
| <b>S5 Aromatics and Polycyclic aromatic hydrocarbons (PAHs)</b>                       | <b>S6</b>  |
| <b>S6 Levoglucosan detection and quantification using MIR spectroscopy</b>            | <b>S7</b>  |
| <b>S7 Lignin signatures</b>                                                           | <b>S10</b> |

---

## S1 Experimental set-up

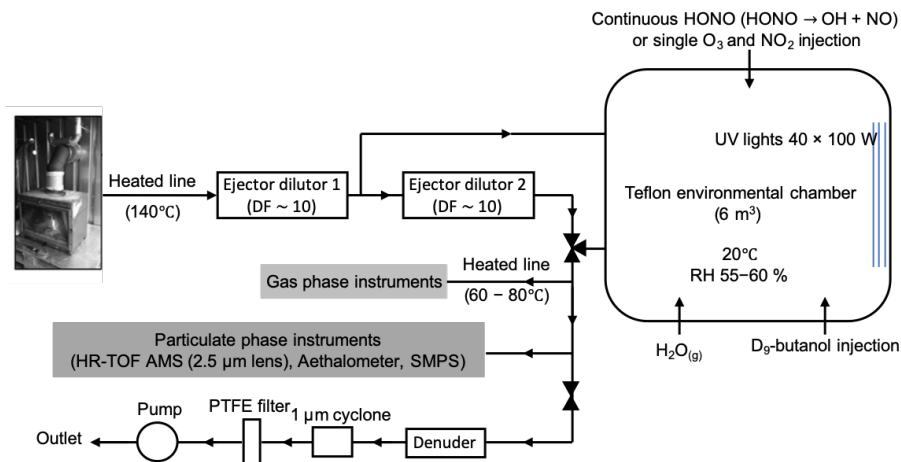

**Figure S1.** Schematic of the experimental set-up used for photo-oxidation and dark oxidation of biomass burning and coal combustion emissions.

## S2 Blank subtraction

As can be seen from Fig. S2, the blank subtraction algorithm used in this work permits better identification of organic FG absorbances that are either overlapping with PTFE absorbances (e.g. the carbonyl peak) or are completely masked by them (e.g. the levoglucosan and organonitrate peaks). In addition, water vapor and CO<sub>2</sub> bands are eliminated with this method.

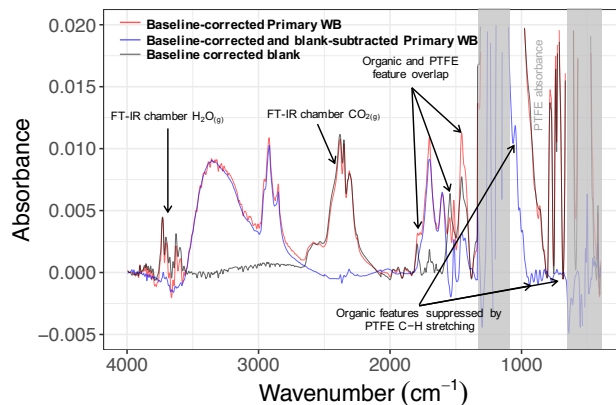

**Figure S2.** Comparison between baseline-corrected (red) and blank-subtracted baseline-corrected spectra (blue) of WB aerosols.

### S3 Dimensionality reduction

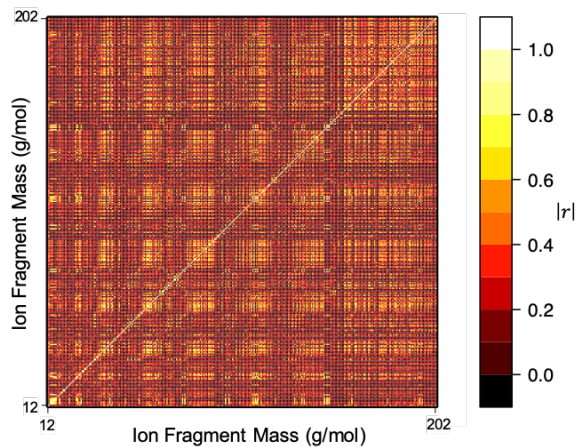

**Figure S3.** Heat map of correlation matrix of mass fragments.

### S4 The MIR and AMS spectra and chemical composition of the chamber experiments

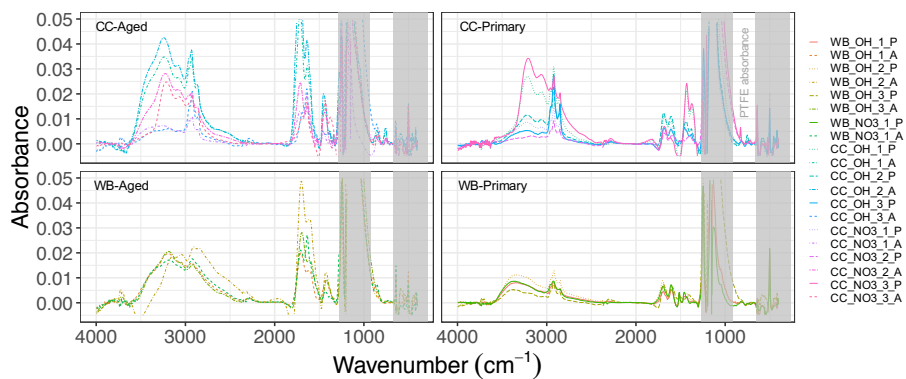

**Figure S4.** Baseline-corrected spectra of wood burning (WB) and coal combustion (CC) emissions separated by emission source and aerosol type.

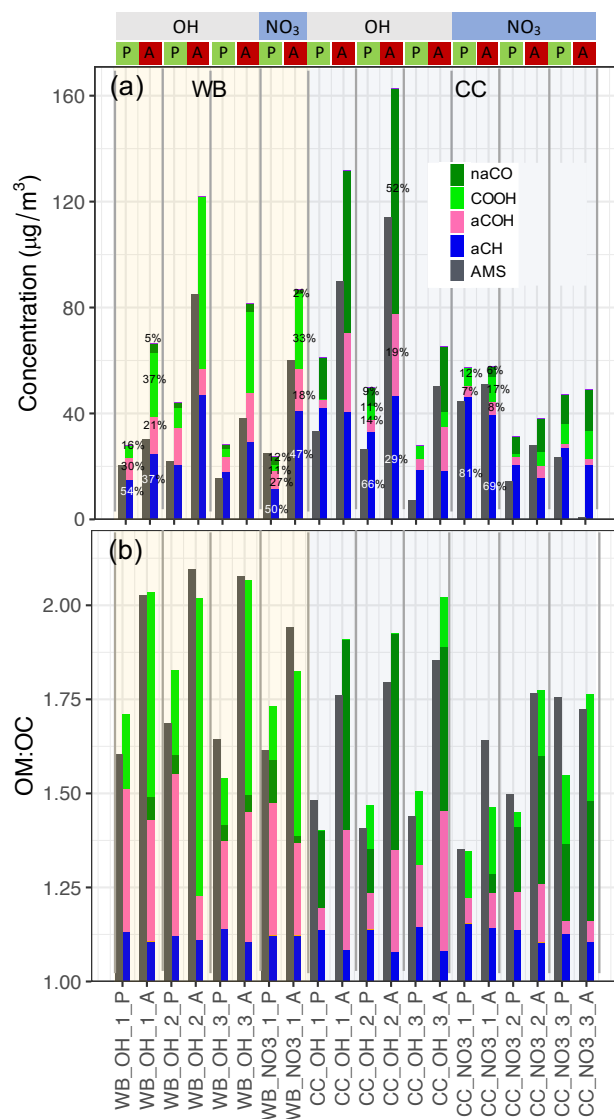

**Figure S5.** (a) Bar plot comparing AMS and MIR OA concentration estimates separated by functional group. The emission pairs (primary and aged emissions of the same experiment) are grouped by vertical lines. The type of aerosol (P: primary, A: aged), emission source (WB and CC), and oxidant used for aging (OH: hydroxyl radical,  $\text{NO}_3$ : nitrate radical) are indicated for each experiment. The percentage of each FG to total OA mass before and after aging is indicated for some experiments. (b) Bar plot comparing AMS OM:OC estimates with that of MIR spectroscopy separated by contribution of each functional group.

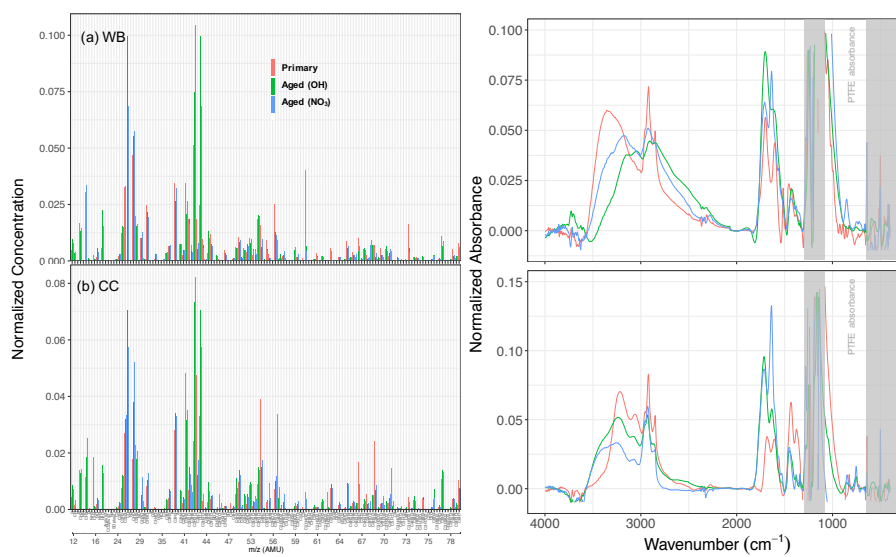

**Figure S6.** AMS normalized mass spectra (shown up to  $m/z$  80) averaged during filter sampling for 20 minutes (left) and normalized mid-infrared spectra (Euclidean norm) of WB (a) and CC (b) on filter.

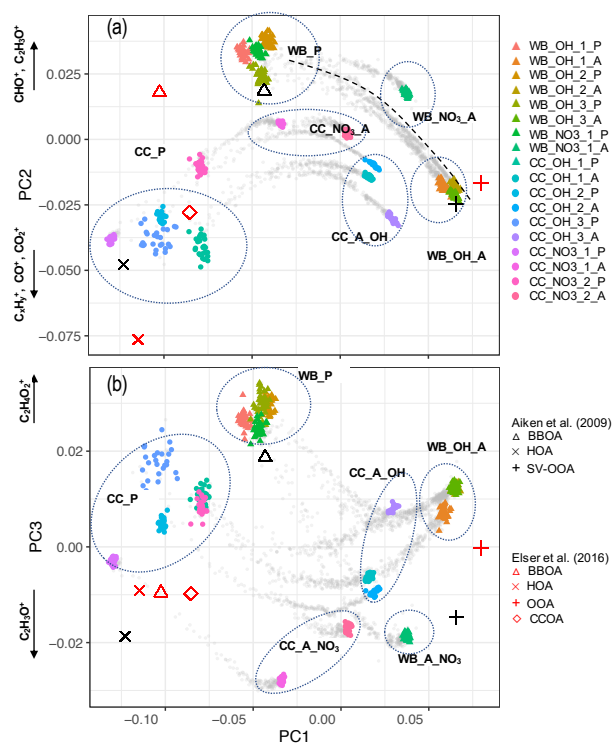

**Figure S7.** Biplots of PC2–PC1 (a), PC3–PC1 (b). The AMS measurements corresponding to filter sampling periods are color coded. The oxidation trajectories out of filter sampling periods are illustrated by gray dots. The clusters of samples based on their fuel and oxidant are indicated by dashed circles.

## S5 Aromatics and Polycyclic aromatic hydrocarbons (PAHs)

In this work, the following AMS fragment ions attributed to aromatics are quantified (Bruns et al., 2015; Pavia et al., 2008):  
10  $C_6H_5^+$ ,  $C_7H_7^+$ ,  $C_7H_5O^+$ ,  $C_8H_5O_2^+$ ,  $C_6H_6^+$ ,  $C_6H_6O^+$ ,  $C_8H_9^+$ ,  $C_8H_{10}^+$ ,  $C_8H_8^+$ ,  $C_7H_7O^+$ , and  $C_7H_8O^+$ . The summed concentration of these fragments is correlated with the MIR out-of-plane aromatic CH peak absorbance at  $754\text{ cm}^{-1}$  ( $r^2 = 0.70$ ; Fig. S8). This correlation is considerably stronger than that of AMS total OA mass concentration with the MIR out-of-plane aromatic CH peak absorbance ( $r^2 = 0.49$ ), suggesting a physical connection between the AMS fragments and the MIR absorbance at  $754\text{ cm}^{-1}$ . The mentioned aromatic fragments contribute up to 6 % to the total OA mass. It is believed that oxygenated aromatics  
15 undergo fragmentation during electron impact ionization; thus, their contribution is possibly underestimated using AMS fragments.

From the PAH fragment ions suggested by Bruns et al. (2015) and Elser et al. (2016),  $C_{10}H_7^+$ ,  $C_{10}H_8^+$ ,  $C_{10}H_9^+$ ,  $C_{12}H_8^+$ ,  $C_{13}H_9^+$ ,  $C_{14}H_{10}^+$ ,  $C_{16}H_{10}^+$  fragment ions were quantified in this work. The mentioned aromatic fragments contribute up to 3 % to the total OA mass. However, the fragments quantified in this work are not complete and oxygenated PAHs are also  
20 believed to undergo fragmentation during electron impact ionization (McLafferty and Tureček, 1993); thus, their contribution is possibly underestimated.

Mid-infrared aromatic CH absorbances are, however, not significantly different between oxygenated and non-oxygenated aromatics and PAHs. The mid-infrared OOP peak absorbance normalized by total OA mass can be an indicator of relative contribution of aromatic CH. This parameter is on average four times higher for CC aerosol compared to WB.

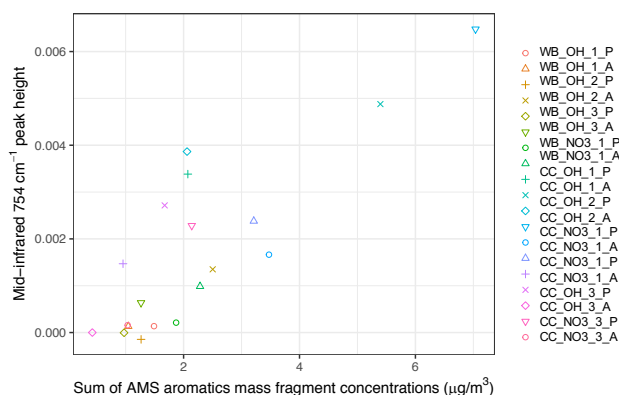

**Figure S8.** Scatter plot comparing MIR absorbance at  $754\text{ cm}^{-1}$  (attributed the aromatic CH out-of-plane vibration) and sum of AMS fragment ions attributed to aromatics over the filter sampling periods for each experiment ( $r^2 = 0.70$ ). The corresponding fragments were taken from Bruns et al. (2015) and Pavia et al. (2008).

## 25 S6 Levoglucosan detection and quantification using MIR spectroscopy

In previous studies (e.g. Russell et al., 2009; Faber et al., 2017), the alcohol COH abundances (calculated using MIR spectra) were compared to the abundance of AMS fragment ions attributed to levoglucosan fragmentation ( $C_2H_4O_2^+$  and  $C_3H_5O_2^+$ ), often resulting in low correlation coefficients. Levoglucosan, however, absorbs at several specific frequencies in mid-infrared range (860, 890, 920, 950, 990, 1012, and  $1050\text{ cm}^{-1}$ ) which are not observed for other compounds containing the aCOH group (Interference with other anhydrous sugars, monnasan and galactosan is possible; Fig. S9a). In addition to lack of these specific absorption other compounds usually have high abundance of non-alcohol FGs that dominate the spectra. As a results, the specific levoglucosan peaks, which become identifiable after blank subtraction, have been used in this study to quantify levoglucosan (an important tracer of biomass burning). By scaling the mentioned peaks in a pure levoglucosan MIR spectrum to that of WB samples, it can be seen that approximately 40 % of the aCOH functional group in WB\_OH\_2\_P (a primary WB sample having high concentration of levoglucosan) is due to levoglucosan (Fig. S9b). By using the same method, we estimate that levoglucosan is responsible for, on average, 20 % of the aCOH group in primary WB aerosols and less than 10 % in aged WB aerosols, suggesting levoglucosan degradation with aging (Hennigan et al., 2010). The specific levoglucosan absorbances in primary and aged CC aerosols are generally below detection limit of FT-IR (negative absorptions at peak in  $860\text{-}1050\text{ cm}^{-1}$  region; Fig. S10), suggesting negligible amounts of levoglucosan in these samples.

40 The  $C_2H_4O_2^+$  fragment ion ( $m/z$  60 in unit mass resolution) in AMS spectrum is shown to be a tracer of levoglucosan (Aiken et al., 2009; Faber et al., 2017; Schneider et al., 2006) in spite of having interference from other molecules, such as long-chain carboxylic acids (Schneider et al., 2006). In order to calculate levoglucosan concentrations from AMS measurements, 0.3 % of OA was subtracted from the  $C_2H_4O_2^+$  ion fragment signal (accounting for other molecules producing the same signal) and the remaining signal was called “levoglucosan-equivalent” concentration. The averaged “levoglucosan-equivalent” signal over 45 the filter sampling periods is highly correlated to levoglucosan peak intensities in MIR spectra (Fig. S10).

The decrease in levoglucosan-equivalent AMS signal (on average  $1.11\text{ h}^{-1}$ ) and FT-IR levoglucosan absorbances (on average  $0.75\text{ h}^{-1}$ ) with aging are much more that what can be attributed solely to particle-phase wall losses with a rate constant on the order  $0.2\text{-}0.3\text{ h}^{-1}$ .



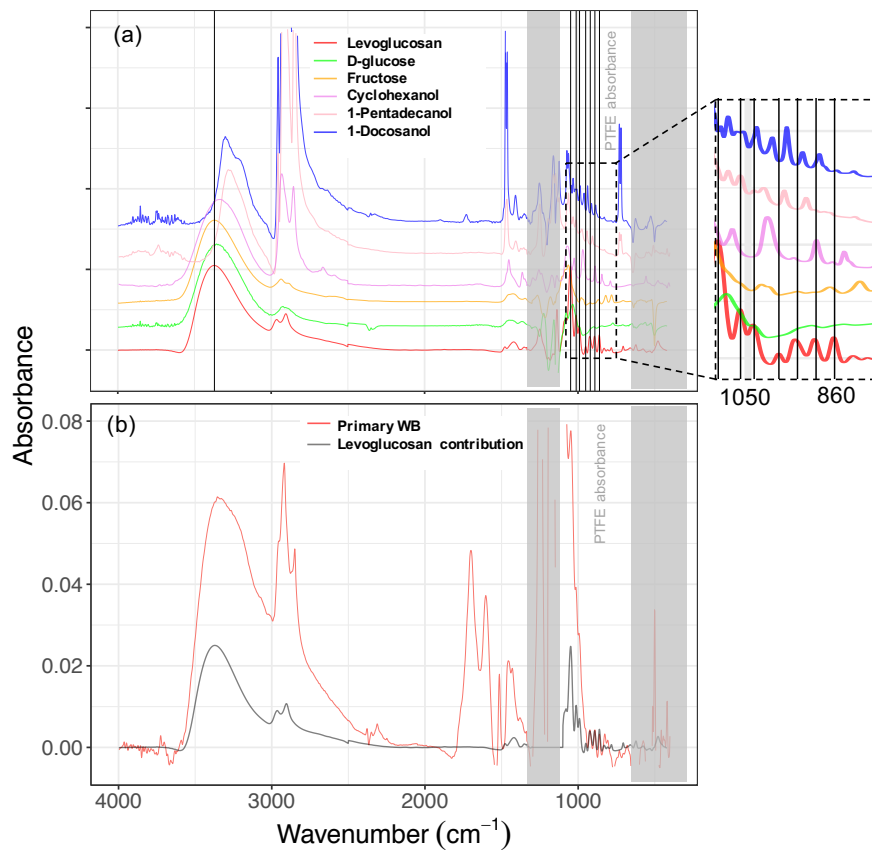

**Figure S9.** (a) Baseline corrected spectra of six different organic compounds containing the aCOH group (e.g. sugars, sugar derivatives, cyclic and straight-chain alcohols). Peak frequencies of levoglucosan are indicated by vertical lines ( $860$ ,  $890$ ,  $920$ ,  $950$ ,  $990$ ,  $1012$ , and  $1050$   $\text{cm}^{-1}$ ). (b) Baseline-corrected spectra of fresh wood burning (WB) aerosols and levoglucosan scaled based of its signature at  $860$ – $1050$   $\text{cm}^{-1}$ . The contribution of levoglucosan to the fresh WB aCOH is estimated to be approximately 40 % in this case (WB\_OH\_2\_P). The spectra of d-glucose and fructose are taken from Ruthenburg et al. (2014).

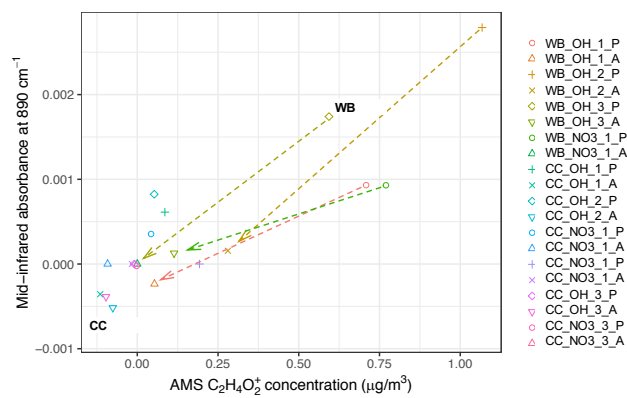

**Figure S10.** Scatter plot comparing the MIR absorbances attributed to levoglucosan and AMS C<sub>2</sub>H<sub>4</sub>O<sub>2</sub><sup>+</sup> fragment ion concentration averaged over the filter sampling periods ( $r^2 = 0.76$ ). 0.03 % of OA concentration is subtracted from C<sub>2</sub>H<sub>4</sub>O<sub>2</sub><sup>+</sup> mass concentration to account for the non-levoglucosan sources (Aiken et al., 2009). Arrows show the change in levoglucosan with aging.

## S7 Lignin signatures

- 50 The peak at  $1515\text{ cm}^{-1}$  is observed in lignin, WB aerosols, and coniferyl alcohol (a monolignol) due to aromatic ring stretching. A similar peak is observed in para-substituted compounds with a few  $\text{cm}^{-1}$  shift in the peak frequency from that of lignin. No similar peak is observed compounds without para substitutions. The methoxy peak at  $2820\text{ cm}^{-1}$  is also relatively weak for lignin, coniferyl alcohol, and WB aerosols.

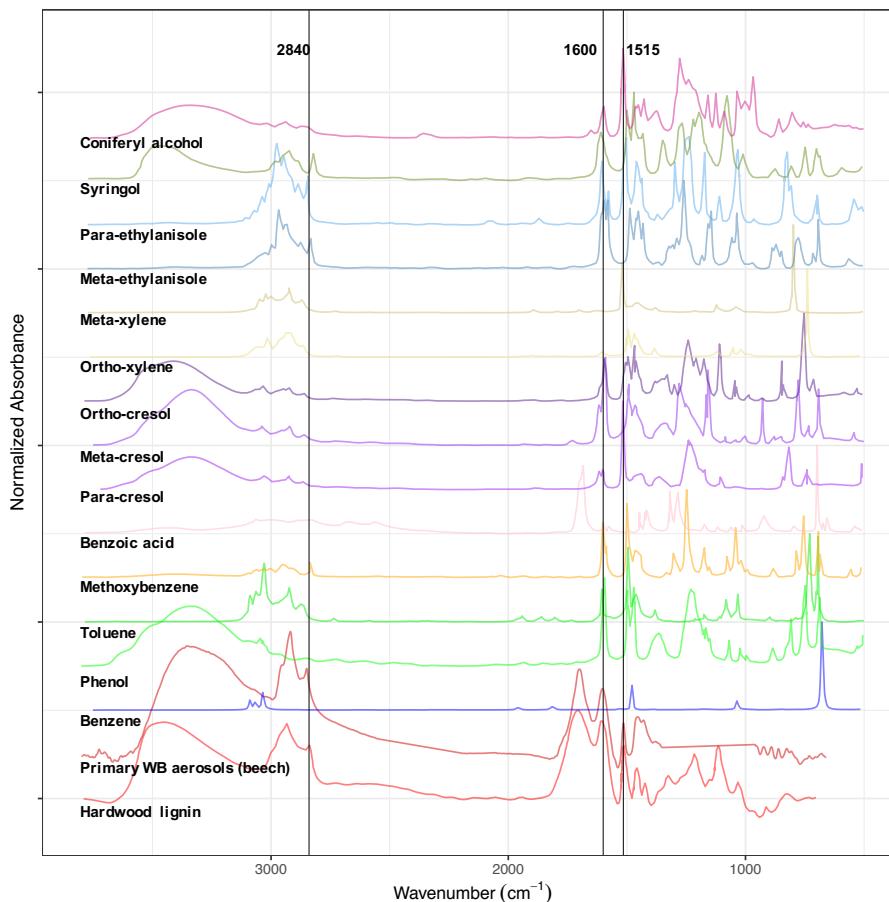

**Figure S11.** MIR spectra of hardwood lignin (KBr Pellet) from Boeriu et al. (2004), fresh beech wood burning aerosols (this work), coniferyl alcohol (film) from Boeriu et al. (2004), and some other substituted aromatic compounds (neat) from SpectraBase database (<https://spectrabase.com/>).

- 55 The peak at  $1515\text{ cm}^{-1}$  is correlated with the AMS  $\text{C}_8\text{H}_9\text{O}_2^+$  fragment ( $r^2 = 0.68$ ), which is attributed G lignin fragmentation (Tolbert and Ragauskas, 2017; Saito et al., 2005).

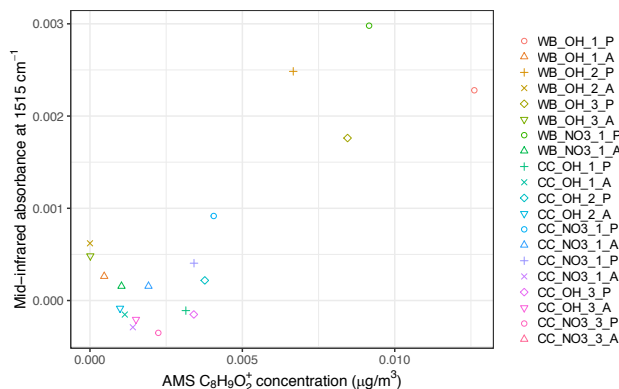

**Figure S12.** Scatter plot comparing the MIR 1520  $\text{cm}^{-1}$  peak absorbance, attributed to lignin, and the AMS  $\text{C}_8\text{H}_9\text{O}_2^+$  fragment ion concentration averaged over the filter sampling periods ( $r^2 = 0.68$ ).

## References

- Aiken, A. C., Salcedo, D., Cubison, M. J., Huffman, J. A., DeCarlo, P. F., Ulbrich, I. M., Docherty, K. S., Sueper, D., Kimmel, J. R., Worsnop, D. R., Trimborn, A., Northway, M., Stone, E. A., Schauer, J. J., Volkamer, R. M., Fortner, E., de Foy, B., Wang, J., Laskin, A., Shutthanandan, V., Zheng, J., Zhang, R., Gaffney, J., Marley, N. A., Paredes-Miranda, G., Arnott, W. P., Molina, L. T., Sosa, G., and Jimenez, J. L.: Mexico City Aerosol Analysis during MILAGRO Using High Resolution Aerosol Mass Spectrometry at the Urban Supersite (T0) – Part 1: Fine Particle Composition and Organic Source Apportionment, *Atmos. Chem. Phys.*, p. 21, 2009.
- Boeriu, C. G., Bravo, D., Gosselink, R. J. A., and van Dam, J. E. G.: Characterisation of Structure-Dependent Functional Properties of Lignin with Infrared Spectroscopy, *Ind. Crops Prod.*, 20, 205–218, <https://doi.org/10.1016/j.indcrop.2004.04.022>, 2004.
- Bruns, E., Krapf, M., Orasche, J., Huang, Y., Zimmermann, R., Drinovec, L., Močnik, G., El-Haddad, I., G. Slowik, J., Dommen, J., Baltensperger, U., and Prevot, A.: Characterization of Primary and Secondary Wood Combustion Products Generated under Different Burner Loads, *Atmos. Chem. Phys.*, 15, 2825–2841, <https://doi.org/10.5194/acp-15-2825-2015>, 2015.
- Elser, M., Huang, R.-J., Wolf, R., Slowik, J. G., Wang, Q., Canonaco, F., Li, G., Bozzetti, C., Daellenbach, K. R., Huang, Y., Zhang, R., Li, Z., Cao, J., Baltensperger, U., El-Haddad, I., and Prévôt, A. S. H.: New Insights into  $\text{PM}_{2.5}$  Chemical Composition and Sources in Two Major Cities in China during Extreme Haze Events Using Aerosol Mass Spectrometry, *Atmos. Chem. Phys.*, 16, 3207–3225, <https://doi.org/10.5194/acp-16-3207-2016>, 2016.
- Faber, P., Drewnick, F., Bierl, R., and Borrmann, S.: Complementary Online Aerosol Mass Spectrometry and Offline FT-IR Spectroscopy Measurements: Prospects and Challenges for the Analysis of Anthropogenic Aerosol Particle Emissions, *Atmos. Environ.*, 166, 92–98, <https://doi.org/10.1016/j.atmosenv.2017.07.014>, 2017.
- Hennigan, C. J., Sullivan, A. P., Collett, J. L., and Robinson, A. L.: Levoglucosan Stability in Biomass Burning Particles Exposed to Hydroxyl Radicals, *Geophys. Res. Lett.*, 37, <https://doi.org/10.1029/2010GL043088>, 2010.
- McLafferty, F. W. and Tureček, F.: Interpretation of Mass Spectra, vol. 8, University Science Books, Mill Valley, CA, USA, fourth edn., 1993.
- Pavia, D. L., Lampman, G. M., Kriz, G. S., and Vyvyan, J. A.: Introduction to Spectroscopy, Brooks Cole, Belmont, CA, fourth edn., 2008.

- Russell, L. M., Bahadur, R., Hawkins, L. N., Allan, J., Baumgardner, D., Quinn, P. K., and Bates, T. S.: Organic Aerosol Characterization by Complementary Measurements of Chemical Bonds and Molecular Fragments, *Atmos. Environ.*, 43, 6100–6105, <https://doi.org/10.1016/j.atmosenv.2009.09.036>, 2009.
- Ruthenburg, T. C., Perlin, P. C., Liu, V., McDade, C. E., and Dillner, A. M.: Determination of Organic Matter and Organic Matter to Organic Carbon Ratios by Infrared Spectroscopy with Application to Selected Sites in the IMPROVE Network, *Atmos. Environ.*, 86, 47–57, <https://doi.org/10.1016/j.atmosenv.2013.12.034>, 2014.
- 85 Saito, K., Kato, T., Takamori, H., Kishimoto, T., and Fukushima, K.: A New Analysis of the Depolymerized Fragments of Lignin Polymer Using ToF-SIMS, *Biomacromolecules*, 6, 2688–2696, <https://doi.org/10.1021/bm050147o>, 2005.
- Schneider, J., Weimer, S., Drewnick, F., Borrmann, S., Helas, G., Gwaze, P., Schmid, O., Andreae, M. O., and Kirchner, U.: Mass Spectrometric Analysis and Aerodynamic Properties of Various Types of Combustion-Related Aerosol Particles, *Int. J. Mass Spectrom.*, 258, 37–49, <https://doi.org/10.1016/j.ijms.2006.07.008>, 2006.
- 90 Tolbert, A. and Ragauskas, A. J.: Advances in Understanding the Surface Chemistry of Lignocellulosic Biomass via Time-of-Flight Secondary Ion Mass Spectrometry, *Energy Sci. Eng.*, 5, 5–20, <https://doi.org/10.1002/ese3.144>, 2017.
